# Supplementary material
Source: PubMed Central journal article supplement (PMC1691067)
Supplement: 12184820s01.pdf [file 12184820s01.pdf]

These are electronic appendices to the paper by Yoccoz *et al.* 2002 Age- and density-dependent reproductive effort in male red deer. *Proc. R. Soc. Lond. B* **269**, 1523-1528.

Electronic appendices are refereed with the text. However, no attempt has been made to impose a uniform editorial style on the electronic appendices.

Electronic appendix Fig. 1. The relationship between body weight and age presented at different stages of the rut and for 3 different densities; results of the (first row) selected model by AIC (equivalent to fig. 2 in main text) and (second row) a simplified model. The predicted values of weight are plotted, all variables other than age, density and date of culling being taken as equal to their mean value. The curve corresponds to population P3.

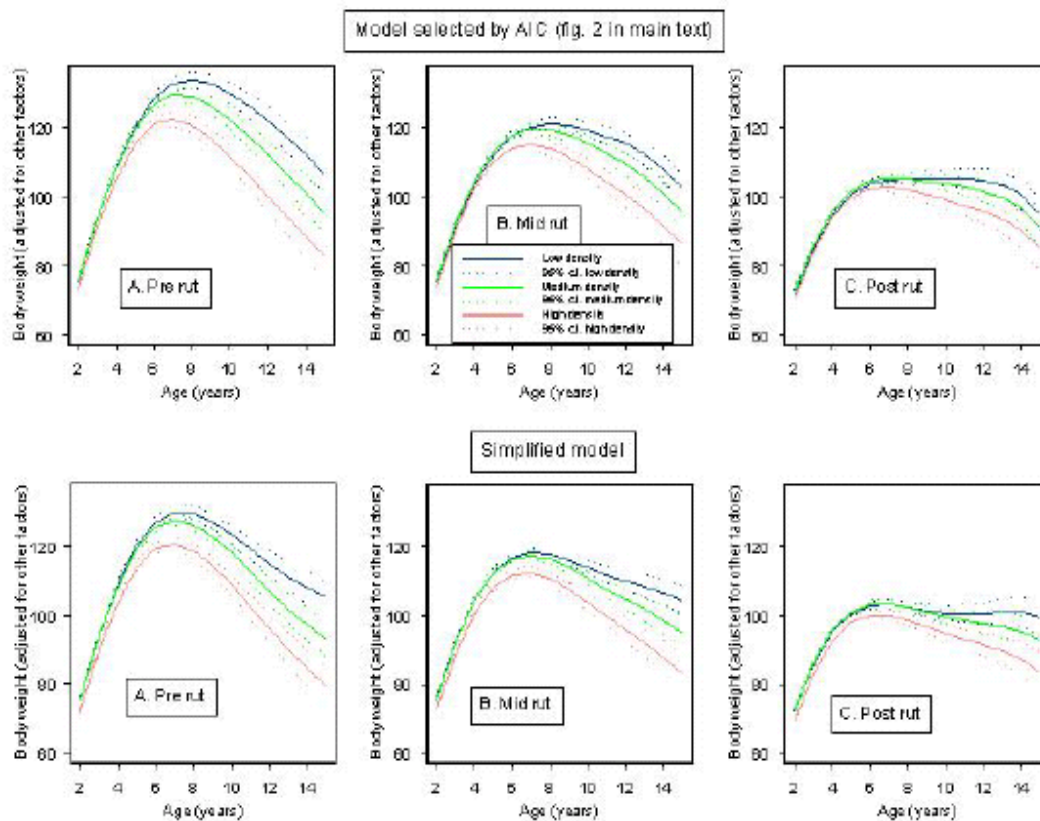

Electronic appendix Table 1. Sample sizes for age classes of male red deer at the west coast of Norway included in the analysis.

| Age (yr) | 1    | 2    | 3    | 4   | 5   | 6   | 7   | 8   | 9  | 10 | 11 | 12 | 13 | 14 | 15 | 16 | 17 | 18 | 19 | Sum   |
|----------|------|------|------|-----|-----|-----|-----|-----|----|----|----|----|----|----|----|----|----|----|----|-------|
| n        | 5524 | 4096 | 2142 | 875 | 500 | 311 | 154 | 127 | 69 | 40 | 29 | 15 | 9  | 8  | 6  | 3  | 1  | 3  | 1  | 13913 |

Supplemental Table 2. Test statistics from additive models presented in Figure 1 of the main text.

| Fig in main text | Age | <i>dfsplines</i> | <i>df</i> | <i>F</i> | <i>P</i> |
|------------------|-----|------------------|-----------|----------|----------|
| 1A               | 1   | 1 versus 2       | 1         | 17.171   | < 0.001  |
| 1B               | 2   | 3 versus 4       | 1         | 4.597    | 0.032    |
| 1C               | 3   | 3 versus 4       | 1         | 6.879    | 0.009    |
| 1D               | 4   | 2 versus 3       | 1         | 5.498    | 0.019    |
| 1E               | 5-7 | 3 versus 4       | 1         | 4.564    | 0.033    |
| 1F               | >7  | 2 versus 3       | 1         | 3.216    | 0.074    |

Electronic appendix Table 3. Results from analysis done by removing or adding terms to the model selected by AIC (for which the absolute AIC value is given). The reference level for the factor “Population” is “P1”. The terms of interest (**bolded**) are (1) the interaction between Age\*Density, which demonstrates that the effect of density on body weight is age-dependent, (2) the interaction between Age<sup>2</sup>\*Density, which shows that the curvature for body weight against male age is dependent on population density (i.e., curves do not have the same shape), and (3) the interaction (Date of culling)\*Density\*Age, which shows that weight loss during rut is dependent on male age and population density. P-values are indicative as they are derived from a model selected using AIC.

|                                     |                                                  | <i>df</i> | $\Delta$ AIC | <i>F</i>     | <i>P</i>      |
|-------------------------------------|--------------------------------------------------|-----------|--------------|--------------|---------------|
|                                     | Model selected by AIC                            |           | (-54920.86)  |              |               |
| removing term                       | Density*(Date of culling)                        | 1         | 0.86         | 2.84         | 0.0917        |
|                                     | Age <sup>3</sup> *Density                        | 1         | 1.22         | 3.20         | 0.0736        |
|                                     | NAO <sup>2</sup>                                 | 1         | 2.91         | 4.88         | 0.0272        |
|                                     | Density*(Date of culling) <sup>2</sup>           | 1         | 3.66         | 5.62         | 0.0178        |
|                                     | Age <sup>2</sup> *(Date of culling)              | 1         | 4.20         | 6.16         | 0.0131        |
|                                     | <b>Age<sup>2</sup>*Density</b>                   | 1         | <b>5.82</b>  | <b>7.77</b>  | <b>0.0053</b> |
|                                     | NAO <sup>4</sup>                                 | 1         | 6.39         | 8.34         | 0.0039        |
|                                     | <b>Age*Density</b>                               | 1         | <b>8.25</b>  | <b>10.19</b> | <b>0.0014</b> |
|                                     | Age <sup>3</sup> *Population                     | 4         | 9.62         | 4.38         | 0.0015        |
|                                     | Population*NAO                                   | 4         | 9.90         | 4.45         | 0.0014        |
|                                     | <b>(Date of culling)*Density*Age</b>             | 1         | <b>10.04</b> | <b>11.97</b> | <b>0.0005</b> |
|                                     | Age <sup>3</sup> *(Date of culling)              | 1         | 10.24        | 12.17        | 0.0005        |
|                                     | Diversity of altitudes                           | 1         | 10.94        | 12.87        | 0.0003        |
|                                     | Population*Density <sup>4</sup>                  | 5         | 11.35        | 4.25         | 0.0007        |
|                                     | Age <sup>4</sup> *(Date of culling)              | 1         | 11.93        | 13.85        | 0.0002        |
|                                     | Population*Density <sup>3</sup>                  | 5         | 13.37        | 4.65         | 0.0003        |
|                                     | Age <sup>2</sup> *Population                     | 4         | 14.33        | 5.55         | 0.0002        |
|                                     | Population*Density <sup>5</sup>                  | 5         | 14.78        | 4.93         | 0.0002        |
|                                     | NAO <sup>3</sup>                                 | 1         | 17.40        | 19.30        | 0.0000        |
|                                     | Population*Density <sup>2</sup>                  | 5         | 20.07        | 5.99         | 0.0000        |
|                                     | Cumulative density of the past 10 years          | 1         | 24.38        | 26.25        | 0.0000        |
|                                     | Age*Population                                   | 4         | 28.88        | 9.18         | 0.0000        |
|                                     | (Date of culling) <sup>3</sup>                   | 1         | 36.08        | 37.91        | 0.0000        |
| Proportion of high altitude habitat | 1                                                | 54.28     | 56.06        | 0.0000       |               |
| Diversity of aspects                | 1                                                | 134.83    | 136.72       | 0.0000       |               |
| Distance from the coast             | 1                                                | 214.54    | 216.98       | 0.0000       |               |
| adding term                         | (Date of culling) <sup>4</sup>                   | 1         | -0.09        | 0.15         | 0.1493        |
|                                     | Population*NAO <sup>2</sup>                      | 4         | 0.50         | 1.87         | 0.1133        |
|                                     | Age <sup>4</sup> *(Date of culling) <sup>2</sup> | 1         | 1.18         | 0.82         | 0.3650        |
|                                     | Density <sup>6</sup>                             | 1         | 1.72         | 0.28         | 0.5982        |
|                                     | Density*Age <sup>4</sup>                         | 1         | 1.96         | 0.04         | 0.8401        |
|                                     | Age <sup>5</sup>                                 | 1         | 2.00         | 0.01         | 0.9307        |
|                                     | NAO <sup>7</sup>                                 | 1         | 2.00         | 0.00         | 0.9984        |
|                                     | Population*Age <sup>4</sup>                      | 4         | 3.51         | 1.12         | 0.3466        |

Electronic appendix Table 4. Results from removing/adding terms to a simplified model (obtained by removing the most complex interactions terms, as well as some high-order terms, such as NAO<sub>4</sub>). The reference level for the factor “Population” is “P1”. See Supplementary Table 3 for an explanation of the terms of interest (**bolded**).

|                                         | <i>df</i> | $\Delta$ AIC | <i>F</i>     | <i>P</i>      |
|-----------------------------------------|-----------|--------------|--------------|---------------|
| Simple model                            |           | (-54877.57)  |              |               |
| NAO <sup>2</sup>                        | 1         | 2.14         | 4.13         | 0.0422        |
| <b>(Date of culling)*Density*Age</b>    | <b>1</b>  | <b>5.32</b>  | <b>7.28</b>  | <b>0.0070</b> |
| Age <sup>2</sup> *(Date of culling)     | 1         | 6.84         | 8.80         | 0.0030        |
| <b>Age*Density</b>                      | <b>1</b>  | <b>7.61</b>  | <b>9.57</b>  | <b>0.0020</b> |
| Population*Density <sup>4</sup>         | 5         | 9.77         | 3.94         | 0.0014        |
| Age <sup>3</sup> *(Date of culling)     | 1         | 12.93        | 14.87        | 0.0001        |
| <b>Age<sup>2</sup>*Density</b>          | <b>1</b>  | <b>13.13</b> | <b>15.06</b> | <b>0.0001</b> |
| Age <sup>4</sup> *(Date of culling)     | 1         | 13.57        | 15.51        | 0.0001        |
| Population*Density <sup>2</sup>         | 5         | 14.98        | 4.98         | 0.0001        |
| NAO <sup>3</sup>                        | 1         | 15.92        | 17.85        | 0.0000        |
| Diversity of altitudes                  | 1         | 15.93        | 17.86        | 0.0000        |
| Population*(Density) <sup>5</sup>       | 5         | 15.93        | 5.17         | 0.0001        |
| Population*(Density) <sup>3</sup>       | 5         | 16.40        | 5.26         | 0.0001        |
| Cumulative density of the past 10 years | 1         | 16.73        | 18.65        | 0.0000        |
| NAO                                     | 1         | 28.03        | 29.92        | 0.0000        |
| (Date of culling) <sup>3</sup>          | 1         | 29.68        | 31.56        | 0.0000        |
| (Age) <sup>2</sup> *Population          | 4         | 43.29        | 12.78        | 0.0000        |
| Proportion of high altitude habitat     | 1         | 62.80        | 64.64        | 0.0000        |
| Age*Population                          | 4         | 78.83        | 21.67        | 0.0000        |
| (Date of culling) <sup>2</sup>          | 1         | 124.68       | 126.64       | 0.0000        |
| Diversity of aspects                    | 1         | 140.17       | 142.21       | 0.0000        |
| Distance from the coast                 | 1         | 218.19       | 220.87       | 0.0000        |

Electronic appendix Table 5. Parameter estimates of the simplified linear model (least square estimates). The reason for presenting estimates from the simplified model is that estimates of higher order interactions (which were common in the model selected by AIC; see Supplementary table 3) are not readily interpretable. The reference level for the factor “Population” is “P1”.

|                                                              | Value    | Std. Error |
|--------------------------------------------------------------|----------|------------|
| Intercept                                                    | 1.57460  | 0.36110    |
| Population(P2-P1)                                            | -0.02130 | 0.00900    |
| Population(P3-P1)                                            | 0.08910  | 0.00980    |
| Population(P4-P1)                                            | 0.08870  | 0.04010    |
| Population(P5-P1)                                            | -0.00480 | 0.01760    |
| Density                                                      | -0.03470 | 0.01020    |
| Density <sup>2</sup>                                         | -0.03470 | 0.00860    |
| Density <sup>3</sup>                                         | 0.03100  | 0.01070    |
| Density <sup>4</sup>                                         | 0.01080  | 0.00330    |
| Density <sup>5</sup>                                         | -0.00920 | 0.00300    |
| NAO                                                          | 0.00910  | 0.00170    |
| Age                                                          | 0.44460  | 0.00700    |
| Age <sup>2</sup>                                             | -0.06180 | 0.00210    |
| Age <sup>3</sup>                                             | 0.00360  | 0.00020    |
| Age <sup>4</sup>                                             | -0.00010 | 0.00000    |
| Cumulative density of the past 10 years<br>(Date of culling) | -0.00780 | 0.00180    |
| (Date of culling) <sup>2</sup>                               | 0.00240  | 0.00650    |
| (Date of culling) <sup>3</sup>                               | -0.02240 | 0.00200    |
| (Date of culling) <sup>4</sup>                               | 0.00760  | 0.00140    |
| Diversity of altitudes                                       | 0.04020  | 0.00950    |
| Proportion of high altitude habitat                          | -0.15600 | 0.01940    |
| Diversity of aspects                                         | 2.07090  | 0.17360    |
| NAO <sup>2</sup>                                             | 0.00060  | 0.00030    |
| NAO <sup>3</sup>                                             | -0.00050 | 0.00010    |
| Distance from the coast                                      | 0.07610  | 0.00510    |
| (Date of culling)*Density*Age                                | 0.00200  | 0.00070    |
| Population(P2)*Density                                       | 0.01040  | 0.01220    |
| Population(P3)*Density                                       | 0.03230  | 0.01410    |
| Population(P4)*Density                                       | -0.17820 | 0.21950    |
| Population(P5)*Density                                       | -0.03290 | 0.06700    |
| Population(P2)*Density <sup>2</sup>                          | 0.04440  | 0.01700    |
| Population(P3)*Density <sup>2</sup>                          | 0.01510  | 0.01230    |
| Population(P4)*Density <sup>2</sup>                          | 1.76920  | 1.59660    |
| Population(P5)*Density <sup>2</sup>                          | -0.22750 | 0.14640    |
| Population(P2)*Density <sup>3</sup>                          | -0.04330 | 0.01550    |
| Population(P3)*Density <sup>3</sup>                          | -0.06620 | 0.01660    |
| Population(P4)*Density <sup>3</sup>                          | 7.49070  | 5.16490    |
| Population(P5)*Density <sup>3</sup>                          | 0.48130  | 0.19800    |
| Population(P2)*Density <sup>4</sup>                          | -0.03130 | 0.00900    |
| Population(P3)*Density <sup>4</sup>                          | -0.01010 | 0.00410    |
| Population(P4)*Density <sup>4</sup>                          | 6.34390  | 4.21470    |
| Population(P5)*Density <sup>4</sup>                          | -0.19040 | 0.45530    |
| Population(P2)*Density <sup>5</sup>                          | 0.02100  | 0.00550    |
| Population(P3)*Density <sup>5</sup>                          | 0.01570  | 0.00380    |
| Population(P4)*Density <sup>5</sup>                          | 1.53480  | 1.00780    |
| Population(P5)*Density <sup>5</sup>                          | -0.01780 | 0.20600    |
| Density*Age <sup>2</sup>                                     | -0.00080 | 0.00020    |
| (Date of culling)*Age                                        | -0.00530 | 0.00680    |
| Population(P2)*Age                                           | 0.01590  | 0.00440    |
| Population(P3)*Age                                           | -0.00490 | 0.00470    |
| Population(P4)*Age                                           | -0.02670 | 0.01930    |
| Population(P5)*Age                                           | -0.04280 | 0.00620    |
| Population(P2)*Age <sup>2</sup>                              | -0.00090 | 0.00050    |
| Population(P3)*Age <sup>2</sup>                              | 0.00010  | 0.00050    |
| Population(P4)*Age <sup>2</sup>                              | 0.00140  | 0.00160    |
| Population(P5)*Age <sup>2</sup>                              | 0.00340  | 0.00060    |
| Density*Age                                                  | 0.00620  | 0.00200    |
| Age <sup>2</sup> *(Date of culling)                          | -0.00640 | 0.00220    |
| Age <sup>3</sup> *(Date of culling)                          | 0.00090  | 0.00020    |
| Age <sup>4</sup> *(Date of culling)                          | 0.00000  | 0.00000    |
| Density*(Date of culling)                                    | -0.00270 | 0.00200    |
